# Supplementary material for: Maxwell’s Mixing Equation Revisited: Characteristic Impedance Equations for Ellipsoidal Cells
Source: PubMed Central journal article supplement — Biophys J. 2015 Jul 21;109(2):194–208. doi: 10.1016/j.bpj.2015.06.021 (PMC4621811; doi:10.1016/j.bpj.2015.06.021), 2015-07-21

## Supporting material

### Maxwell's Mixing Equation Revisited: Characteristic Impedance Equations for Ellipsoidal Cells

Marco Stubbe<sup>1</sup> and Jan Gimsa<sup>1,\*</sup>

<sup>1</sup>Chair of Biophysics, University of Rostock, Rostock, Germany

e-mail: marco.stubbe@uni-rostock.de, Phone: +49-381-498 6027;

e-mail: jan.gimsa@uni-rostock.de, Phone: +49-381-498 6020

### Maple 12© code

```
# derivation of simplified impedance equations for suspensions of ellipsoidal objects based on  
the model of Gimsa and Wachner (27,28)
```

```
# Code developed by Dr. Marco Stubbe
```

```
# An RC-model was introduced into Maxwell-Wagners mixing equation based on the axial  
longitudinal element (ALE) model for ellipsoidal single shell models
```

#### variables

```
# Zi, Ze and Zm are the impedances of the internal and external media as well as the cell  
membrane
```

```
# the indices a, b and c refer to the three principal axes with their lengths of ra, rb and rc
```

```
# xia, xib and xic are the relative influential radii along the semi axes
```

```
# xi is the relative influential radius of the larger sphere
```

```
# omega is the circular frequency
```

```
# A is the cross sectional area of each of the volume elements of the internal, membrane and  
external media. A is arbitrarily small and equal and constant along each principal axis
```

```
# Cm and gm are the sectoral capacity and the area-specific membrane conductance
```

```
# p is the volume fraction of the objects
```

```
# clearing internal memory
```

```
> restart;
```

#### general simplifications

```
> gm:=0:
```

#### defining impedances

```
# defining the impedances for all media elements
```

```
> Zia:=ra/(A*(si+I*omega*ei)):
```

```
Zea:=xia*ra/(A*(se+I*omega*ee)): Zm:=1/(A*(gm+I*omega*Cm)):
```

```
> Zib:=rb/(A*(si+I*omega*ei)):
```

```
Zeb:=xib*rb/(A*(se+I*omega*ee)):
```

```
> Zic:=rc/(A*(si+I*omega*ei)):
Zec:=xic*rc/(A*(se+I*omega*ee)):
```

### Clausius-Mossotti-factor

# defining the Clausius-Mossotti-factors (CMF) for the semi axes a, b, and c

# simplifications:

# the CMF can be simplified for different characteristic frequencies, depending on the electrical simplifications applied to the complete equivalent circuit (28)

# e.g. Zm can be neglected for frequencies beyond membrane dispersion

# HINT: removing impedance components from the CMF (e.g. by converting these impedance components to text) is a very fast and simple method to consider the model properties in certain frequency bands

```
> CMFa:=(1+xia)/xia*(1-(Zia+Zm)/(Zia+Zm+Zea)*(1+xia)):
CMFb:=(1+xib)/xib*(1-(Zib+Zm)/(Zib+Zm+Zeb)*(1+xib)):
CMFc:=(1+xic)/xic*(1-(Zic+Zm)/(Zic+Zm+Zec)*(1+xic)):
> CMFa:=simplify(CMFa,symbolic):
CMFb:=simplify(CMFb,symbolic): CMFc:=simplify(CMFc,symbolic):
# derivation of the CMF for randomly oriented objects from the three semi axis components
> CMF:=simplify((CMFa+CMFb+CMFc)/3,symbolic):
```

### combining Maxwells mixing equation with the ALE model

# simplifications:

```
> xi:=1/2: # the relative influential radius of the large sphere is 1/2
> s:=solve((s-(se+I*omega*ee))/(xi/(1+xi)*s+1/(1+xi)*
(se+I*omega*ee))=p*CMF,s):
```

### expressions for the conductivity and permittivity of the suspension for the DC case

```
> sigma_low:=collect(simplify(limit(evalc(Re(s)),omega=0),
symbolic),[p]);
> epsilon_low:=collect(simplify(limit(evalc(Im(s))/omega,
omega=0),symbolic),[r,Cm,p]);
```

### expressions for the conductivity and permittivity of the suspension for infinitely high frequencies

# reinitializing variables

```
> p:='p': xi:='xi': omega:='omega': gm:='gm': ee:='ee':
ei:='ei':
```

# calculation of conductivity and permittivity

```
> sigma_inf:=collect(simplify(limit(evalc(Re(s)),omega
=infinity),symbolic),[p,xi]);
> epsilon_inf:=collect(simplify(limit(evalc(Im(s))/omega,omega
=infinity),symbolic),[r,Cm,xi,p]);
```

### calculating differences between the DC- $\beta_{1,2}$ , $\beta_{1,2}^{-\infty}$ and DC- $\infty$ plateaus (optional)

```

# reinitializing variables
> p:='p': xi:='xi': omega:='omega': gm:='gm': ee:='ee':
ei:='ei':
# calculation of conductivity and permittivity
> sigma_d:=simplify(sigma_inf-sigma_low,symbolic);
> epsilon_d:=simplify(epsilon_inf-epsilon_low,symbolic);

```

### simplifications of equations (optional)

```

# factorization of the equations
> factor(numer(sigma_d)); factor(denom(sigma_d));
> factor(numer(epsilon_d)); factor(denom(epsilon_d));

```

### assigning values to variables, e.g. for a single shell sphere

```

# define physical constants here:
> e0:=8.854e-12:
# radii of the semiaxis
# never use more than three positions after decimal point to avoid erroneous results in the
calculations of the influential radii
> ra:=5.000e-6: rb:=4.999e-6: rc:=5.001e-6:

```

### derivations of the relative influential radii of the semi axes of the objects

```

# definitions of the semi axis
> a:=ra:
> b:=rb:
> c:=rc:
> Vabc:=4/3*evalf(Pi)*a*b*c:

> # definition of the Legendre-Integrals of the 1st and 2nd order for determining the
depolarizing coefficients of the general ellipsoid
> beta:=(a,b)->b/a: delta:=(a,c)->c/a:
> LF:=(k,theta) -> Int(1/(sqrt(1-
k^2*(sin(psi)^2))),psi=0..theta):
> LE:=(k,theta) -> Int((sqrt(1-
k^2*(sin(psi)^2))),psi=0..theta):
> k:=(beta,delta) -> ((1-beta^2)/(1-delta^2))^(0.5):
> psi:=(delta) -> arccos(delta):

> # depolarizing coefficients and influential radii in the direction of the semi axis (a,b,c)
> na:=(beta,delta) -> beta*delta/((1-delta^2)^(0.5)*(1-
beta^2))*(LF(k(beta,delta),psi(delta))-
LE(k(beta,delta),psi(delta))):
> nb:=(beta,delta) -> - na(beta,delta)+beta*delta/((1-
delta^2)^(0.5)*(beta^2-
delta^2))*(LE(k(beta,delta),psi(delta)))-delta^2/(beta^2-
delta^2):
> nc:=(beta,delta) -> - beta*delta/((1-delta^2)^(0.5)*(beta^2-
delta^2))*LE(k(beta,delta),psi(delta))+beta^2/(beta^2-
delta^2):

```

```

> ridr:=(n)->1/(1-n): dr:=(r,n)->(ridr(n)-1)*r: xif:=(n)
->ridr(n)-1:

> na:=evalf(na(beta(a,b),delta(a,c)));
nb:=evalf(nb(beta(a,b),delta(a,c)));
nc:=evalf(nc(beta(a,b),delta(a,c))); n_sum:=evalf(na+nb+nc);
> xia:=evalf(xif(na)); xib:=evalf(xif(nb));
xic:=evalf(xif(nc)); xi_sum:=evalf(xia+xib+xic);

# media parameters
> se:=0.1: ee:=80*e0:
> si:=0.50: ei:=50*e0:
> Cm:=1e-2: gm:=0:
# volume fraction
> p:=0.1:

```

### plotting conductivity and relative permittivity of the suspension

```

# defining the circular frequency
> omega:=2*Pi*10^logf:

# plotting
> plot(Re(s),logf=2..20, labels=[lg(f) (Hz), sigma (S/m)]);
evalf(sigma_low); evalf(sigma_inf);

> plot(Im(s)/omega/e0, logf=2..20, labels=[lg(f) (Hz),
epsilon[r]]);
evalf(epsilon_low/e0); evalf(epsilon_inf/e0);

```

### complex plot of the specific impedance of the suspension

```

> with(plots):
p1:=plot([Re(1/s),Im(1/s),logf=0..11], view=[0..11, 0..-5],
labels=[Re(Z[spec]) (Omega), Im(Z[spec]) (Omega)]):
display([p1]);

```

### Hints for final simplifications

# for further simplifications of the equations Taylor or Pade approximations can be used, alternatively the obtained terms can be reduced manually  
# final simplifications, e.g. for binomial equations must be done for the individual equations either by hand or using Mathematica®

## Simplifications of the media impedances and the Clausius-Mossotti-factor

In the ALE approach, the equivalent circuits for the internal, membrane and external impedances were simplified by reducing their number of R and C components depending on the considered frequency range. These simplifications reduce the complexity of the Clausius-Mossotti-factor and the calculation time (28). The following schemes show examples for such simplifications in different frequency ranges (compare to Fig. 1 B).

DC case:

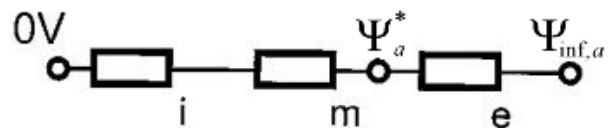

membrane dispersion:

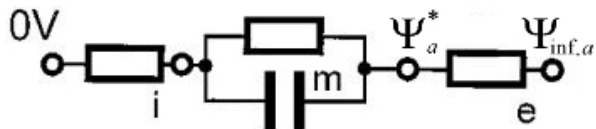

beyond capacitive membrane bridging:

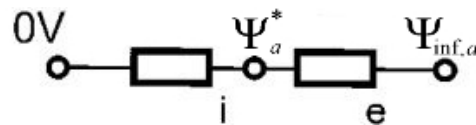

bulk media dispersion:

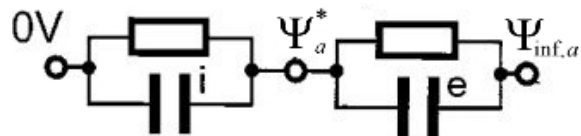

infinitely high frequencies:

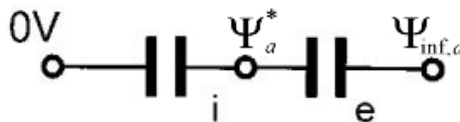

Supplement: mmc1.pdf [file mmc1.pdf]
